# Supplementary material for: An Anatomical Study Using Computed Tomography, Magnetic Resonance Imaging, and Rhinoscopy of the Nasal Cavity of Domestic Cat (Felis silvestris catus L.) and Big Cats: Lion (Panthera leo leo L.), Leopard (Panthera pardus kotiya L.), and Cheetah (Acinonyx jubatus jubatus S.)
Source: MDPI journal article supplement (doi:10.3390/ani14081172), 2024-04-13
Supplement: s1 [file s1]

**Table S1.** MRI parameters used in this study.

| Study code | Weighted | Pulse sequence | Dimensional plane | Acquisition | TE    | TR   | TI | NEX | Slice thickness | Interslice gap | Field of view | Matrix dimensions |
|------------|----------|----------------|-------------------|-------------|-------|------|----|-----|-----------------|----------------|---------------|-------------------|
| LEOPARD    | T1       | SE             | AXIAL             | 2D          | 14    | 340  | 0  | 1   | 3               | 3.5            | 100           | 0\320\224\0       |
| LEOPARD    | T2       | FSE            | AXIAL             | 2D          | 88.1  | 3700 | 0  | 1   | 3               | 3.5            | 75            | 0\320\256\0       |
| LEOPARD    | T1       | SE             | SAGITTAL          | 2D          | 14    | 440  | 0  | 1   | 4               | 4.1            | 75            | 0\320\224\0       |
| LEOPARD    | T2       | FRFSE          | SAGITTAL          | 2D          | 106.3 | 6040 | 0  | 1   | 4               | 4.1            | 100           | 384\0\0\224       |
| LEOPARD    | T1       | SE             | CORONAL           | 2D          | 14    | 460  | 0  | 1   | 3.5             | 3.8            | 75            | 0\320\256\0       |
| LEOPARD    | T2       | FRFSE          | CORONAL           | 2D          | 88.5  | 3820 | 0  | 1   | 3.5             | 3.8            | 75            | 0\320\224\0       |
| LION       | T1       | SE             | AXIAL             | 2D          | 14    | 300  | 0  | 1   | 3               | 3.5            | 75            | 0\320\224\0       |
| LION       | T2       | FSE            | AXIAL             | 2D          | 87    | 6000 | 0  | 1   | 3               | 3.5            | 75            | 0\320\256\0       |
| LION       | T1       | SE             | SAGITTAL          | 2D          | 14    | 240  | 0  | 1   | 4               | 4.1            | 75            | 0\320\224\0       |
| LION       | T2       | FRFSE          | SAGITTAL          | 2D          | 114.3 | 4820 | 0  | 1   | 4               | 4.1            | 100           | 514\0\0\256       |
| LION       | T1       | SE             | CORONAL           | 2D          | 14    | 300  | 0  | 1   | 3.5             | 3.8            | 75            | 0\320\256\0       |
| LION       | T2       | FRFSE          | CORONAL           | 2D          | 87    | 4700 | 0  | 1   | 3.5             | 3.8            | 75            | 0\320\224\0       |
| CHEETAH    | T1       | SE             | AXIAL             | 2D          | 14    | 480  | 0  | 1   | 3               | 3.1            | 75            | 0\320\224\0       |
| CHEETAH    | T2       | FRFSE          | AXIAL             | 2D          | 105.2 | 4460 | 0  | 1   | 4               | 4.1            | 75            | 384\0\0\224       |
| CHEETAH    | T1       | SE             | SAGITTAL          | 2D          | 14    | 320  | 0  | 1   | 4               | 4.1            | 100           | 0\320\224\0       |

|         |    |       |          |    |       |      |   |   |     |     |     |             |
|---------|----|-------|----------|----|-------|------|---|---|-----|-----|-----|-------------|
| CHEETAH | T2 | FRFSE | SAGITTAL | 2D | 105.2 | 4460 | 0 | 1 | 4   | 4.1 | 100 | 384\0\0\224 |
| CHEETAH | T1 | SE    | CORONAL  | 2D | 14    | 400  | 0 | 1 | 3.5 | 3.8 | 75  | 0\320\256\0 |
| CHEETAH | T2 | FRFSE | CORONAL  | 2D | 92.8  | 3800 | 0 | 1 | 3.5 | 3.8 | 75  | 0\320\224\0 |
| CAT     | T1 | SE    | AXIAL    | 2D | 14    | 480  | 0 | 1 | 3   | 3.1 | 75  | 0\320\224\0 |
| CAT     | T2 | FSE   | AXIAL    | 2D | 92.3  | 3000 | 0 | 1 | 3   | 3.1 | 75  | 0\320\256\0 |
| CAT     | T1 | SE    | SAGITTAL | 2D | 14    | 360  | 0 | 1 | 2   | 2.1 | 75  | 0\320\224\0 |
| CAT     | T2 | FRFSE | SAGITTAL | 2D | 109.1 | 2200 | 0 | 1 | 2   | 2.1 | 100 | 384/0/0/224 |
| CAT     | T1 | SE    | CORONAL  | 2D | 14    | 280  | 0 | 1 | 3   | 3.1 | 75  | 0\320\256\0 |
| CAT     | T2 | FRFSE | CORONAL  | 2D | 94.4  | 4840 | 0 | 1 | 3   | 3.1 | 75  | 0\320\224\0 |

*se*: Spin echo sequence; *FrFse*: Fast Recovery Fast Spin Echo sequence.
