# Supplementary material for: An Anatomical Study Using Computed Tomography, Magnetic Resonance Imaging, and Rhinoscopy of the Nasal Cavity of Domestic Cat (Felis silvestris catus L.) and Big Cats: Lion (Panthera leo leo L.), Leopard (Panthera pardus kotiya L.), and Cheetah (Acinonyx jubatus jubatus S.)
Source: MDPI journal article supplement (doi:10.3390/ani14081172), 2024-04-13
Supplement: s1 [file s1]

**Table S2.** Tissue CT density and signal intensity characteristics for this CT and MRI study.

| TISSUES                                                                                                                                                                                                                                                                                                                                                                                                                                                                                                                                                                                                                                                                                                       | CT              | Spin-echo T1-weighted | Spin-echo T2-weighted |
|---------------------------------------------------------------------------------------------------------------------------------------------------------------------------------------------------------------------------------------------------------------------------------------------------------------------------------------------------------------------------------------------------------------------------------------------------------------------------------------------------------------------------------------------------------------------------------------------------------------------------------------------------------------------------------------------------------------|-----------------|-----------------------|-----------------------|
| <ul style="list-style-type: none"> <li>● <b>BONES:</b> Frontal; Nasal; Incisive; Maxillary; Lacrimal, Zygomatic; Vomer and Etmoidal</li> </ul>                                                                                                                                                                                                                                                                                                                                                                                                                                                                                                                                                                |                 |                       |                       |
| <ul style="list-style-type: none"> <li>● <b>Cortical</b></li> </ul>                                                                                                                                                                                                                                                                                                                                                                                                                                                                                                                                                                                                                                           | Hyperattenuated | Very low              | Very low              |
| <ul style="list-style-type: none"> <li>● <b>Bone marrow</b></li> </ul>                                                                                                                                                                                                                                                                                                                                                                                                                                                                                                                                                                                                                                        | Intermediate    | High                  | Intermediate          |
| <ul style="list-style-type: none"> <li>● <b>EXTERNAL NOSE:</b> <ul style="list-style-type: none"> <li>- Nostril</li> <li>- Wing of the nose</li> <li>- Subnasal groove</li> <li>- Dorsal lateral nasal cartilage</li> <li>- Ventral lateral nasal cartilage</li> <li>- Lateral accessory nasal cartilage</li> </ul> </li> </ul>                                                                                                                                                                                                                                                                                                                                                                               | Intermediate    | Intermediate          | Intermediate          |
| <ul style="list-style-type: none"> <li>● <b>NASAL CAVITY:</b> <ul style="list-style-type: none"> <li>- Alar groove</li> <li>- Choanae</li> <li>- Nasal septum cartilage</li> <li>- Vomer nasal organ</li> <li>- Nasal vestibule</li> <li>- Straight fold</li> <li>- Alar fold</li> <li>- Basal fold</li> <li>- Parallel folds</li> <li>- Dorsal nasal concha</li> <li>- Middle nasal concha</li> <li>- Ethmoidal conchae</li> <li>- Ventral nasal concha</li> <li>- Lateral nasal gland</li> <li>- Nasal cavernous plexuses</li> <li>- Dorsal nasal meatus</li> <li>- Middle nasal meatus</li> <li>- Ventral nasal meatus</li> <li>- Common nasal meatus</li> <li>- Ethmoidal meatuses</li> </ul> </li> </ul> | Intermediate    | Intermediate          | Intermediate          |
|                                                                                                                                                                                                                                                                                                                                                                                                                                                                                                                                                                                                                                                                                                               | Hypoattenuated  | Very low              | Very low              |
| <ul style="list-style-type: none"> <li>● <b>PARANASAL SINOSES:</b> <ul style="list-style-type: none"> <li>- Maxillary recess</li> <li>- Frontal sinuses</li> <li>- Frontal sinuses septum</li> <li>- Sphenoidal sinus</li> </ul> </li> </ul>                                                                                                                                                                                                                                                                                                                                                                                                                                                                  | Hypoattenuated  | Very low              | Very low              |
